# Supplementary material for: Prevalence of malocclusion in primary dentition in mainland China, 1988–2017: a systematic review and meta-analysis
Source: PubMed Central journal article supplement (PMC5856803; doi:10.1038/s41598-018-22900-x), 2018-03-16
Supplement: 41598_2018_22900_MOESM1_ESM.pdf [file 41598_2018_22900_MOESM1_ESM.pdf]

**Prevalence of malocclusion in primary dentition in mainland China, 1988-2017:  
a systematic review and meta-analysis**

Lu Shen<sup>1,2,3§</sup>, Fang He<sup>4§</sup>, Cai Zhang<sup>1,2,3</sup>, Haofeng Jiang<sup>1,2,3</sup>, Jinhua Wang<sup>1,2,3\*</sup>

<sup>1</sup>College of Stomatology, Chongqing Medical University, Chongqing, 401147, China.

<sup>2</sup>Chongqing Key Laboratory of Oral Diseases and Biomedical Sciences, Chongqing, 401147, China.

<sup>3</sup>Chongqing Municipal Key Laboratory of Oral Biomedical Engineering of Higher Education, Chongqing, 401147, China.

<sup>4</sup>School of Public Health and Management, Chongqing Medical University, Research Center for Medicine and Social Development, Collaborative Innovation Center of Social Risks Governance in Health, Chongqing Medical University, Chongqing, 400016, China.

§First co-authors

\*Corresponding author

Correspondence to:

Jinhua Wang, College of Stomatology, Chongqing Medical University, Chongqing, China, No.426 Songshibei Road, Yubei District, Chongqing, China; Tel: +86 23 89035824; Fax: +86 23 89035721; E-mail: [dentistwjh@163.com](mailto:dentistwjh@163.com)

**Table S1 | Agreement among authors [kappa coefficients]**

**Table S1a | Agreement among authors on titles and abstracts [kappa coefficients]**

|          |           | Author 2  |           | Total |
|----------|-----------|-----------|-----------|-------|
|          |           | Inclusion | Exclusion |       |
| Author 1 | Inclusion | 277       | 49        | 326   |
|          | Exclusion | 55        | 809       | 864   |
|          | Total     | 332       | 858       | 1,190 |

K1=0.782

**Table S1b | Agreement among authors on full-text analysis [kappa coefficients]**

|          |           | Author 2  |           | Total |
|----------|-----------|-----------|-----------|-------|
|          |           | Inclusion | Exclusion |       |
| Author 1 | Inclusion | 30        | 8         | 38    |
|          | Exclusion | 5         | 234       | 239   |
|          | Total     | 35        | 242       | 277   |

K2=0.795

**Table S2 | Quality assessment of the 31 included studies**

| First author &<br>publication year | Questions |   |   |   |   |   |   |   |   |    |    |    | Score |
|------------------------------------|-----------|---|---|---|---|---|---|---|---|----|----|----|-------|
|                                    | 1         | 2 | 3 | 4 | 5 | 6 | 7 | 8 | 9 | 10 | 11 | 12 |       |
| Huang Caiping 2013                 | Y         | Y | Y | Y | N | N | Y | Y | Y | Y  | Y  | Y  | 10    |
| Wang Jing 2007                     | Y         | Y | Y | N | Y | N | N | Y | Y | Y  | Y  | Y  | 9     |
| Yang Hongzhen 2010                 | Y         | Y | Y | Y | N | Y | N | Y | Y | Y  | Y  | Y  | 10    |
| Xiao Yan 2011                      | Y         | Y | Y | Y | Y | Y | Y | N | N | Y  | N  | Y  | 9     |
| Huang Ning 2005                    | Y         | Y | Y | Y | Y | N | Y | N | N | Y  | Y  | Y  | 9     |
| Yin Yanchun 2014                   | Y         | Y | Y | Y | Y | Y | Y | Y | N | Y  | Y  | Y  | 11    |
| Li Zhaohui 2009                    | Y         | Y | Y | Y | Y | Y | Y | N | N | Y  | Y  | Y  | 10    |
| Lv Yulin 1988                      | Y         | Y | Y | N | Y | N | Y | N | N | Y  | Y  | Y  | 8     |
| Zheng Zhijun 2006                  | Y         | Y | Y | Y | Y | N | Y | N | N | Y  | Y  | Y  | 9     |
| He Hongxu 2011                     | Y         | Y | Y | Y | Y | Y | Y | Y | N | Y  | N  | Y  | 10    |
| Liu Yingqi 2009                    | Y         | Y | Y | Y | Y | N | Y | N | N | Y  | Y  | Y  | 9     |
| Yang Zaibo 2010                    | Y         | Y | Y | Y | Y | N | Y | N | N | Y  | Y  | Y  | 9     |
| Wan Jianying 2013                  | Y         | Y | Y | Y | Y | Y | Y | Y | Y | Y  | Y  | Y  | 12    |
| Huang Guiyue 2015                  | Y         | Y | Y | Y | Y | Y | Y | Y | Y | Y  | Y  | Y  | 12    |
| Li Haifeng 2013                    | Y         | Y | Y | Y | Y | N | Y | N | Y | Y  | N  | Y  | 9     |
| Qu Ling 2001                       | Y         | Y | Y | Y | Y | N | Y | N | Y | Y  | N  | Y  | 9     |
| Yang Tao 2013                      | Y         | Y | Y | N | Y | N | N | N | Y | Y  | Y  | Y  | 8     |
| Sun Xinhua 1990                    | Y         | Y | Y | Y | Y | N | Y | N | N | Y  | Y  | Y  | 9     |
| Feng Jinqiu 2015                   | Y         | Y | Y | Y | Y | Y | Y | Y | Y | Y  | Y  | Y  | 12    |
| Weng Sien 2006                     | Y         | Y | Y | Y | Y | Y | Y | Y | Y | Y  | Y  | Y  | 12    |
| Zhao Fengmei 1999                  | Y         | Y | Y | Y | Y | N | Y | N | N | Y  | Y  | Y  | 9     |
| Zhou Xinhua 2017                   | Y         | Y | Y | Y | Y | Y | Y | Y | Y | Y  | Y  | Y  | 12    |
| Zhang Cuicui 2014                  | Y         | Y | Y | Y | Y | Y | N | N | N | Y  | Y  | Y  | 9     |
| Chen Min 2016                      | Y         | Y | Y | Y | Y | Y | Y | Y | Y | Y  | Y  | Y  | 12    |
| Zhao Zhenjin 2002                  | Y         | Y | Y | Y | N | N | Y | N | N | Y  | Y  | Y  | 8     |
| Li Lin 1992                        | Y         | Y | Y | Y | Y | Y | Y | Y | N | Y  | Y  | Y  | 11    |
| Zhou Zhifei 2016                   | Y         | Y | Y | Y | Y | Y | Y | Y | Y | Y  | Y  | Y  | 12    |
| Liu Yuan 2015                      | Y         | Y | Y | Y | Y | Y | Y | Y | Y | Y  | Y  | Y  | 12    |
| Wang Bing 2000                     | Y         | Y | Y | N | Y | N | Y | N | N | Y  | Y  | Y  | 8     |
| Liang Xueping 1995                 | Y         | Y | Y | N | Y | N | Y | N | N | Y  | Y  | Y  | 8     |
| Fu Minkui 2002                     | Y         | Y | Y | Y | Y | Y | Y | Y | N | Y  | Y  | Y  | 11    |

Y: Yes; N: No; Score: the quality assessment score

**Table S3a | Characteristics of the 31 included studies**

| First author & publication year | Urban/rural areas | Crowding | Spacing | Deep overbite | Deep overjet | Anterior crossbite | Posterior crossbite | Posterior scissor bite | Anterior edge-to-edge | Openbite | Individual malocclusion | Hypodontia | Early loss of primary teeth | Total |
|---------------------------------|-------------------|----------|---------|---------------|--------------|--------------------|---------------------|------------------------|-----------------------|----------|-------------------------|------------|-----------------------------|-------|
| Xiao Yan 2011                   | U                 | 20       | -       | 182           | -            | 402                | 6                   | 1                      | 28                    | -        | -                       | -          | 87                          | 726   |
| Huang Ning 2005                 | R                 | 20       | -       | 157           | 10           | 137                | 12                  | 3                      | 63                    | 16       | -                       | 37         | 35                          | 490   |
| Liu Yingqi 2009                 | U                 | 47       | -       | 147           | -            | 171                | 5                   | 2                      | 52                    | 1        | -                       | -          | 89                          | 514   |
| Yang Zaibo 2010                 | U+R               | 56       | -       | 201           | -            | 282                | 42                  | 38                     | 63                    | 49       | -                       | -          | 265                         | 996   |
| Wan Jianying 2013               | R                 | 17       | -       | 258           | 49           | 197                | -                   | -                      | 38                    | 9        | -                       | -          | -                           | 568   |
| Huang Guiyue 2015               | U                 | 384      | -       | 820           | 2            | 204                | -                   | -                      | 84                    | 6        | -                       | -          | 16                          | 1,516 |
| Li Haifeng 2013                 | U                 | 67       | 99      | -             | -            | 194                | -                   | -                      | -                     | -        | 167                     | -          | -                           | 527   |
| Qu Ling 2001                    | R                 | 8        | -       | 12            | 17           | 40                 | -                   | 6                      | 102                   | 22       | -                       | -          | -                           | 207   |
| Yang Tao 2013                   | U                 | 29       | -       | 20            | 13           | 43                 | -                   | -                      | 8                     | -        | 5                       | 31         | -                           | 149   |
| Sun Xinhua 1990                 | U                 | -        | -       | 206           | 50           | 91                 | -                   | 49                     | 43                    | -        | 99                      | -          | -                           | 538   |
| Feng Jinqiu 2015                | U+R               | 583      | -       | 1,520         | 667          | 330                | -                   | -                      | -                     | 198      | -                       | 65         | 24                          | 3,387 |
| Weng Sien 2006                  | U                 | 16       | 129     | 137           | 4            | 41                 | -                   | -                      | -                     | 0        | -                       | -          | -                           | 327   |
| Zhao Fengmei 1999               | U                 | 8        | -       | 195           | 28           | 177                | -                   | -                      | 31                    | 5        | -                       | -          | -                           | 444   |
| Zhou Xinhua 2017                | U                 | 151      | 1,046   | 1,488         | 791          | 187                | 14                  | -                      | 54                    | 10       | -                       | -          | -                           | 3,741 |
| Li Lin 1992                     | U                 | 8        | 0       | 91            | 14           | 22                 | 7                   | 0                      | 18                    | 14       | 18                      | 16         | -                           | 208   |
| Zhou Zhifei 2016                | U+R               | -        | -       | 840           | 782          | 152                | 169                 | -                      | 55                    | 156      | -                       | -          | -                           | 2,154 |
| Wang Bing 2000                  | U                 | -        | -       | 43            | -            | 90                 | -                   | -                      | 3                     | 9        | 32                      | -          | -                           | 177   |
| Liang Xueping 1995              | U                 | 3        | 17      | 19            | 2            | 18                 | -                   | -                      | -                     | -        | 2                       | -          | -                           | 61    |

C: Chinese; E: English; U: Urban; R: Rural; Score: the quality assessment score

**Table S3b | Characteristics of the 31 included studies**

| First author & publication year | Language | Location of study | U/R | Score | Flush terminal | Mesial step | Distal step | Bilateral symmetry | Total |
|---------------------------------|----------|-------------------|-----|-------|----------------|-------------|-------------|--------------------|-------|
| Huang Caiping 2013              | C        | Yu yao            | U   | 10    | 83             | 39          | 10          | 8                  | 140   |
| Xiao Yan 2011                   | C        | Chang chun        | U   | 9     | 1,704          | 804         | 114         | 102                | 2,724 |
| Huang Ning 2005                 | C        | Shuang liu        | R   | 9     | 295            | 902         | 30          | 52                 | 1,279 |
| Liu Yingqi 2009                 | C        | Han dan           | U   | 9     | 852            | 402         | 57          | 51                 | 1,362 |
| Yang Zaibo 2010                 | C        | En shi            | U+R | 9     | 1,102          | 565         | 108         | 87                 | 1,862 |
| Huang Guiyue 2015               | C        | Kun ming          | U   | 12    | 184            | 1,840       | 92          | -                  | 2,116 |
| Feng Jinqiu 2015                | C        | Shang hai         | U+R | 12    | 1,732          | 891         | 61          | 60                 | 2,744 |
| Zhou Xinhua 2017                | E        | Shang hai         | U   | 12    | 903            | 898         | 264         | 270                | 2,335 |

C: Chinese; E: English; U: Urban; R: Rural; Score: the quality assessment score

**Table S4 | Pooled prevalence of malocclusion in primary dentition across provinces in mainland China**

| Provinces     | Number of study | Sample size | Cases size | Pooled prevalence (%) | 95% CI (%)  | Heterogeneity |                    |
|---------------|-----------------|-------------|------------|-----------------------|-------------|---------------|--------------------|
|               |                 |             |            |                       |             | Q             | I <sup>2</sup> (%) |
| Zhe jiang     | 2               | 882         | 537        | 57.32                 | 32.52-82.12 | 55.35         | 98.2 (95.9-99.2)   |
| He bei        | 3               | 2,733       | 1,164      | 44.21                 | 37.10-51.32 | 26.66         | 92.5 (81.3-97.0)   |
| Ji lin        | 3               | 4,039       | 1,438      | 43.37                 | 21.76-64.98 | 299.59        | 99.3 (99.0-99.6)   |
| Si chuan      | 2               | 4,492       | 1,247      | 30.92                 | 16.35-45.48 | 91.65         | 98.9 (97.8-99.5)   |
| Hei longjiang | 2               | 5,860       | 3,186      | 54.37                 | 53.09-55.64 | 0.26          | 0.0                |
| Fu jian       | 1               | 3,102       | 1,355      | 43.68                 | 41.94-45.43 | -             | -                  |
| Gui zhou      | 1               | 456         | 113        | 24.78                 | 20.82-28.74 | -             | -                  |
| Hu bei        | 1               | 1,862       | 996        | 53.49                 | 51.23-55.76 | -             | -                  |
| Jiang xi      | 1               | 1,600       | 568        | 35.50                 | 33.16-37.84 | -             | -                  |
| Yun nan       | 1               | 2,116       | 1,516      | 71.64                 | 69.72-73.57 | -             | -                  |
| Liao ning     | 2               | 3,039       | 638        | 20.50                 | 17.89-23.10 | 2.31          | 56.0 (0.0-89.6)    |
| Hai nan       | 1               | 1,002       | 207        | 20.66                 | 18.15-23.17 | -             | -                  |
| Shang hai     | 4               | 7,662       | 4,512      | 54.37                 | 23.14-8.559 | 3,131.52      | 99.9 (99.9-99.9)   |
| Hu nan        | 1               | 1,800       | 983        | 54.61                 | 52.31-56.91 | -             | -                  |
| Xin jiang     | 2               | 1,456       | 838        | 55.11                 | 39.87-70.34 | 32.24         | 96.9 (91.8-98.8)   |
| Shan xi       | 2               | 2,344       | 1,545      | 63.31                 | 55.34-71.28 | 3.10          | 67.7 (0.0-92.7)    |
| Ning xia      | 1               | 1,346       | 177        | 13.15                 | 11.34-14.96 | -             | -                  |

**Table S5 | Subgroup analysis of heterogeneity**

| Group                          | Number of studies | Detection rate (%) | 95% CI (%)  | Heterogeneity (I <sup>2</sup> ) |                    |
|--------------------------------|-------------------|--------------------|-------------|---------------------------------|--------------------|
|                                |                   |                    |             | Q                               | I <sup>2</sup> (%) |
| <b>Geographic distribution</b> |                   |                    |             |                                 |                    |
| Southern China                 | 12                | 42.2               | 31.49-53.67 | 3,845.89                        | 99.5               |
| Northern China                 | 18                | 46.0               | 3.55-55.74  | 2,193.82                        | 99.6               |
| <b>Publication year</b>        |                   |                    |             |                                 |                    |
| >2002                          | 22                | 49.1               | 40.91-57.26 | 4,515.16                        | 99.5               |
| ≤2002                          | 9                 | 34.5               | 24.47-46.06 | 1,329.03                        | 99.4               |
| <b>Diagnostic methods</b>      |                   |                    |             |                                 |                    |
| Angle classification           | 29                | 42.4               | 36.25-48.71 | 4,724.20                        | 99.4               |
| Morphological classification   | 2                 | 76.2               | 55.17-89.30 | 184.17                          | 99.5               |
| <b>Urban/rural area</b>        |                   |                    |             |                                 |                    |
| Urban                          | 20                | 42.0               | 32.95-51.67 | 4,503.53                        | 99.6               |
| Rural                          | 3                 | 31.0               | 22.04-41.56 | 87.92                           | 97.7               |

### Checklist S1. PRISMA Checklist

| Section/<br>topic         | # | Checklist item                                                                                                                                                                                                                                                                                              | Reported section #                                                |
|---------------------------|---|-------------------------------------------------------------------------------------------------------------------------------------------------------------------------------------------------------------------------------------------------------------------------------------------------------------|-------------------------------------------------------------------|
| <b>TITLE</b>              |   |                                                                                                                                                                                                                                                                                                             |                                                                   |
| Title                     | 1 | Identify the report as a systematic review, meta-analysis, or both.                                                                                                                                                                                                                                         | Title                                                             |
| <b>ABSTRACT</b>           |   |                                                                                                                                                                                                                                                                                                             |                                                                   |
| Structured summary        | 2 | Provide a structured summary including, as applicable: background; objectives; data sources; study eligibility criteria, participants, and interventions; study appraisal and synthesis methods; results; limitations; conclusions and implications of key findings; systematic review registration number. | Abstract                                                          |
| <b>INTRODUCTION</b>       |   |                                                                                                                                                                                                                                                                                                             |                                                                   |
| Rationale                 | 3 | Describe the rationale for the review in the context of what is already known.                                                                                                                                                                                                                              | Introduction - 1 <sup>st</sup> to 3 <sup>rd</sup> paragraphs      |
| Objectives                | 4 | Provide an explicit statement of questions being addressed with reference to participants, interventions, comparisons, outcomes, and study design (PICOS).                                                                                                                                                  | Introduction – 4 <sup>th</sup> paragraph                          |
| <b>METHODS</b>            |   |                                                                                                                                                                                                                                                                                                             |                                                                   |
| Protocol and registration | 5 | Indicate if a review protocol exists, if and where it can be accessed (e.g., Web address), and, if available, provide registration information including registration number.                                                                                                                               | N/A                                                               |
| Eligibility criteria      | 6 | Specify study characteristics (e.g., PICOS, length of follow-up) and report characteristics (e.g., years considered, language, publication status) used as criteria for eligibility, giving rationale.                                                                                                      | Methods – Search strategy, Selection criteria and data extraction |
| Information sources       | 7 | Describe all information sources (e.g., databases with dates of coverage, contact with study authors to identify additional studies) in the search and date last searched.                                                                                                                                  | Methods – Search strategy and data extraction                     |
| Search                    | 8 | Present full electronic search strategy for at least one database, including any limits used, such that it could be repeated.                                                                                                                                                                               | Methods – Search strategy                                         |
| Study                     | 9 | State the process for selecting studies (i.e.,                                                                                                                                                                                                                                                              | Methods – Selection                                               |

|                                    |    |                                                                                                                                                                                                                        |                                                                                                 |
|------------------------------------|----|------------------------------------------------------------------------------------------------------------------------------------------------------------------------------------------------------------------------|-------------------------------------------------------------------------------------------------|
| selection                          |    | screening, eligibility, included in systematic review, and, if applicable, included in the meta-analysis).                                                                                                             | criteria                                                                                        |
| Data collection process            | 10 | Describe method of data extraction from reports (e.g., piloted forms, independently, in duplicate) and any processes for obtaining and confirming data from investigators.                                             | Methods –Selection criteria and data extraction                                                 |
| Data items                         | 11 | List and define all variables for which data were sought (e.g., PICOS, funding sources) and any assumptions and simplifications made.                                                                                  | Methods –Data extraction                                                                        |
| Risk of bias in individual studies | 12 | Describe methods used for assessing risk of bias of individual studies (including specification of whether this was done at the study or outcome level), and how this information is to be used in any data synthesis. | Methods –Quality assessment, Table S1 and Checklist S2                                          |
| Summary measures                   | 13 | State the principal summary measures (e.g., risk ratio, difference in means).                                                                                                                                          | Methods – Statistical analysis                                                                  |
| Synthesis of results               | 14 | Describe the methods of handling data and combining results of studies, if done, including measures of consistency (e.g., $I^2$ ) for each meta-analysis.                                                              | Methods – Statistical analysis                                                                  |
| Risk of bias across studies        | 15 | Specify any assessment of risk of bias that may affect the cumulative evidence (e.g., publication bias, selective reporting within studies).                                                                           | Methods – Statistical analysis                                                                  |
| Additional analyses                | 16 | Describe methods of additional analyses (e.g., sensitivity or subgroup analyses, meta-regression), if done, indicating which were pre-specified.                                                                       | Methods – Statistical analysis                                                                  |
| <b>RESULTS</b>                     |    |                                                                                                                                                                                                                        |                                                                                                 |
| Study selection                    | 17 | Give numbers of studies screened, assessed for eligibility, and included in the review, with reasons for exclusions at each stage, ideally with a flow diagram.                                                        | Figure 1                                                                                        |
| Study characteristics              | 18 | For each study, present characteristics for which data were extracted (e.g., study size, PICOS, follow-up period) and provide the citations                                                                            | Results –1 <sup>st</sup> paragraph, Table 1 and Table S3                                        |
| Risk of bias within studies        | 19 | Present data on risk of bias of each study and, if available, any outcome level assessment (see item 12).                                                                                                              | Results –1 <sup>st</sup> paragraph, Table S1 and Table S2                                       |
| Results of individual studies      | 20 | For all outcomes considered (benefits or harms), present, for each study: (a) simple summary data for each intervention group (b) effect estimates and confidence intervals, ideally with a forest plot.               | Results –2 <sup>nd</sup> to 8 <sup>th</sup> paragraphs, Table1, Table S3, Figure 4 and Figure 5 |



|                             |    |                                                                                                                                                                                      |                                                                                      |
|-----------------------------|----|--------------------------------------------------------------------------------------------------------------------------------------------------------------------------------------|--------------------------------------------------------------------------------------|
| Synthesis of results        | 21 | Present the main results of the review. If meta-analyses are done, include for each, confidence intervals and measures of consistency.                                               | Results –2 <sup>nd</sup> to 8 <sup>th</sup> paragraphs, Table 2, Table S4, Figure2-5 |
| Risk of bias across studies | 22 | Present results of any assessment of risk of bias across studies (see Item 15).                                                                                                      | Results –9 <sup>th</sup> paragraph and Figure 6                                      |
| Additional analysis         | 23 | Give results of additional analyses, if done (e.g., sensitivity or subgroup analyses, meta-regression [see Item 16]).                                                                | Results –9 <sup>th</sup> paragraph and Table S5                                      |
| <b>DISCUSSION</b>           |    |                                                                                                                                                                                      |                                                                                      |
| Summary of evidence         | 24 | Summarize the main findings including the strength of evidence for each main outcome; consider their relevance to key groups (e.g., healthcare providers, users, and policy makers). | Discussion – 1 <sup>st</sup> to 8 <sup>th</sup> paragraphs                           |
| Limitations                 | 25 | Discuss limitations at study and outcome level (e.g., risk of bias), and at review-level (e.g., incomplete retrieval of identified research, reporting bias).                        | Discussion – 9 <sup>th</sup> paragraph                                               |
| Conclusions                 | 26 | Provide a general interpretation of the results in the context of other evidence, and implications for future research.                                                              | Discussion – 10 <sup>th</sup> paragraph                                              |
| <b>FUNDING</b>              |    |                                                                                                                                                                                      |                                                                                      |
| Funding                     | 27 | Describe sources of funding for the systematic review and other support (e.g., supply of data); role of funders for the systematic review.                                           | Acknowledgements                                                                     |

From: Moher D, Liberati A, Tetzlaff J, Altman DG, The PRISMA Group (2009). Preferred Reporting Items for Systematic Reviews and Meta-Analyses: The PRISMA Statement. PLoS Med 6(7): e1000097. doi:10.1371/journal.pmed1000097. For more information, visit: [www.prisma-statement.org](http://www.prisma-statement.org).

**Checklist S2. STROBE Statement—Checklist of items that should be included in reports of cross-sectional studies**

| No  | Questions                                                           | Score |      |
|-----|---------------------------------------------------------------------|-------|------|
|     |                                                                     | Yes=1 | No=0 |
| 1.  | Are the research questions clearly stated?                          |       |      |
| 2.  | Is the approach appropriate for the research question?              |       |      |
| 3.  | Is the study context clearly described?                             |       |      |
| 4.  | Is the role of the researcher clearly described?                    |       |      |
| 5.  | Is the sampling method clearly described?                           |       |      |
| 6.  | Is the sampling strategy appropriate for the research question?     |       |      |
| 7.  | Is the method of data collection clearly described?                 |       |      |
| 8.  | Is the data collection method appropriate to the research question? |       |      |
| 9.  | Is the method of analysis clearly described?                        |       |      |
| 10. | Are the main characteristics of the population well described?      |       |      |
| 11. | Is the analysis appropriate for the research question?              |       |      |
| 12. | Are the claims made supported by sufficient evidence?               |       |      |

Transcribed from the original paper: Moosazadeh, M., Nekoei-Moghadam, M., Emrani, Z. & Amiresmaili, M. Prevalence of unwanted pregnancy in Iran: a systematic review and meta-analysis. *The International Journal of Health Planning and Management* **29**, e277-e290 (2014). Information on the STROBE Initiative is available at [www.strobe-statement.org](http://www.strobe-statement.org).
